# Supplementary material
Source: ML conference proceedings conference paper supplement (https://openaccess.thecvf.com/content/CVPR2024/html/Li_Efficient_Scene_Recovery_CVPR_2024_paper.html)
Supplement: Supplementary file 1 [file Li_Efficient_Scene_Recovery_CVPR_2024_supplemental.pdf]

## Efficient Scene Recovery Using Luminous Flux Prior

001

Anonymous CVPR submission

002

Paper ID 9583

## 1. Proofs

003

## 1.1. Proof on Eq. (9)

004

$$\int t dt = \int e^{-d \cdot \Delta F \cdot d\beta} \quad (1)$$

$$t = \sqrt{2e^{-d \cdot \beta \cdot \Delta F}}.$$

005

First, we make the following assumption: in  $\int e^{-d \cdot \Delta F \cdot d\beta}$ ,  $d\beta$  is considered a variable, not an infinitesimal. We denote  $d\beta$  as  $\beta$ . Then it can be written as:  $\int e^{-d \cdot \Delta F \cdot \beta}$ . However, this expression is still missing the integrand.

006

007

Next, we denote the entire exponent part, i.e.,  $-d \cdot \Delta F \cdot \beta$ , as a function of  $\beta$  called  $A(\beta)$ , and integrate over  $A(\beta)$ , written as  $\int e^{A(\beta)} dA(\beta)$ .

008

009

At this point, this integral is precisely a common form, which is the integral of the derivative of a function of  $e$  with respect to itself. According to the Fundamental Theorem of Calculus, the result of this integral is the function itself, which is  $e^{A(\beta)}$ .

010

011

012

013

Therefore, it can be deduced that  $\int e^{-d \cdot \Delta F \cdot \beta} d(-d \cdot \Delta F \cdot \beta) = e^{-d \cdot \Delta F \cdot \beta}$ .

## 1.2. Proof on Eq. (12)

014

$$\lim_{\Delta F \rightarrow 0} t = \sqrt{2F^{k \cdot \Delta F}}$$

$$\approx F^{k \cdot \Delta F}$$

$$\approx 1 + k \cdot \Delta F \cdot \log F$$

015

016

017

The value of  $\Delta F$  is the ratio of the minimum and maximum values in a sliding window. According to DCP [1], the minimum value in the sliding window is necessarily the dark channel, and the value of the dark channel is usually very small, close to 0. Therefore,  $\lim_{\Delta F \rightarrow 0}$  holds true.

018

019

020

---

<sup>1</sup>Lei Zhang is the corresponding author.

021 **1.3. Overall models**

- 022 • DCP (Dark Channel Prior) [1]: DCP is a classic haze removal algorithm that utilizes the dark channel prior in
- 023 an image to estimate the haze density and haze image in a scene, thereby removing haze from the image.
- 024 • MSCNN (Multi-Scale CNN) [6]: MSCNN is a multi-scale convolutional neural network model used for haze
- 025 removal in images. It extracts features at different scales and combines global and local information for haze
- 026 processing.
- 027 • AOD-Net (All-in-one dehazing network) [4]: AOD-Net is a deep learning-based haze removal model that esti-
- 028 mates the atmospheric light and atmospheric light transmission in an image to remove haze and restore image
- 029 clarity.
- 030 • CAP (Color Attenuation Prior) [9] formulates a linear model between depth information and the attenuation
- 031 coefficient
- 032 • HRDCP (Halo-Reduced Dark Channel Prior [7]) The method first corrects color anomalies in the LAB color
- 033 space using the gray world theory, then employs the Dark Channel Prior (DCP) technique for dust removal.
- 034 Subsequently, it enhances contrast using a Gamma function improved Contrast Limited Adaptive Histogram
- 035 Equalization (CLAHE), complemented by a guided filter for artifact mitigation.
- 036 • CVC (Chromatic Variance Consistency [2]) The method commences by executing a color correction process
- 037 that safeguards chromatic variances and means, enhancing the overall image quality. It then applies a gamma
- 038 correction-based dehazing technique, followed by a cross-correlation-based chromatic histogram shift, to mini-
- 039 mize reddish artifacts, resulting in significantly improved image clarity.
- 040 • ULAP (Underwater Light Attenuation Prior) [8] The method utilizes learning-based supervised linear regression
- 041 to train its coefficients, allowing for precise estimation of the depth map. This, in turn, enables straightforward
- 042 calculation of the background light and transmission maps for RGB light, leading to the recovery of the true
- 043 scene radiance underwater.
- 044 • Retinex [3] The Retinex method is a powerful image enhancement technique that aims to improve the perceived
- 045 brightness, contrast, and color of an image. It operates on the assumption that an image can be decomposed
- 046 into the product of illumination and reflectance, and works by independently modifying these components to
- 047 achieve a more visually pleasing result. However, it is not specifically designed for scene recovery tasks.
- 048 • Rank One (Rank One Prior) [5] The cornerstone of the proposed method is an intensity projection strategy,
- 049 driven by a simplified rank-one transmission prior, to estimate the transmission.

Table 1. We categorized the scenes targeted by each model. Hazy weather is designated as gray, sandy weather as yellow-brown, underwater environments as blue, and models applicable to all three weather conditions are designated as lightgreen.

|            |             |              |           |             |         |
|------------|-------------|--------------|-----------|-------------|---------|
| Type       | Haze        |              |           |             |         |
| Model Name | DCP [1]     | MSCNN [6]    | LDCP [10] | AOD-Net [4] | CAP [9] |
| Type       | Sand        |              |           |             |         |
| Model Name | HRDCP [7]   |              |           | CVC [2]     |         |
| Type       | Water       |              |           |             |         |
| Model Name | Dive+       |              |           | ULAP [8]    |         |
| Type       | Full        |              |           |             |         |
| Model Name | retinex [3] | Rank One [5] |           | LFP         |         |

## 2. Visualizations

050

## 2.1. Sand-Dust image enhancement

051

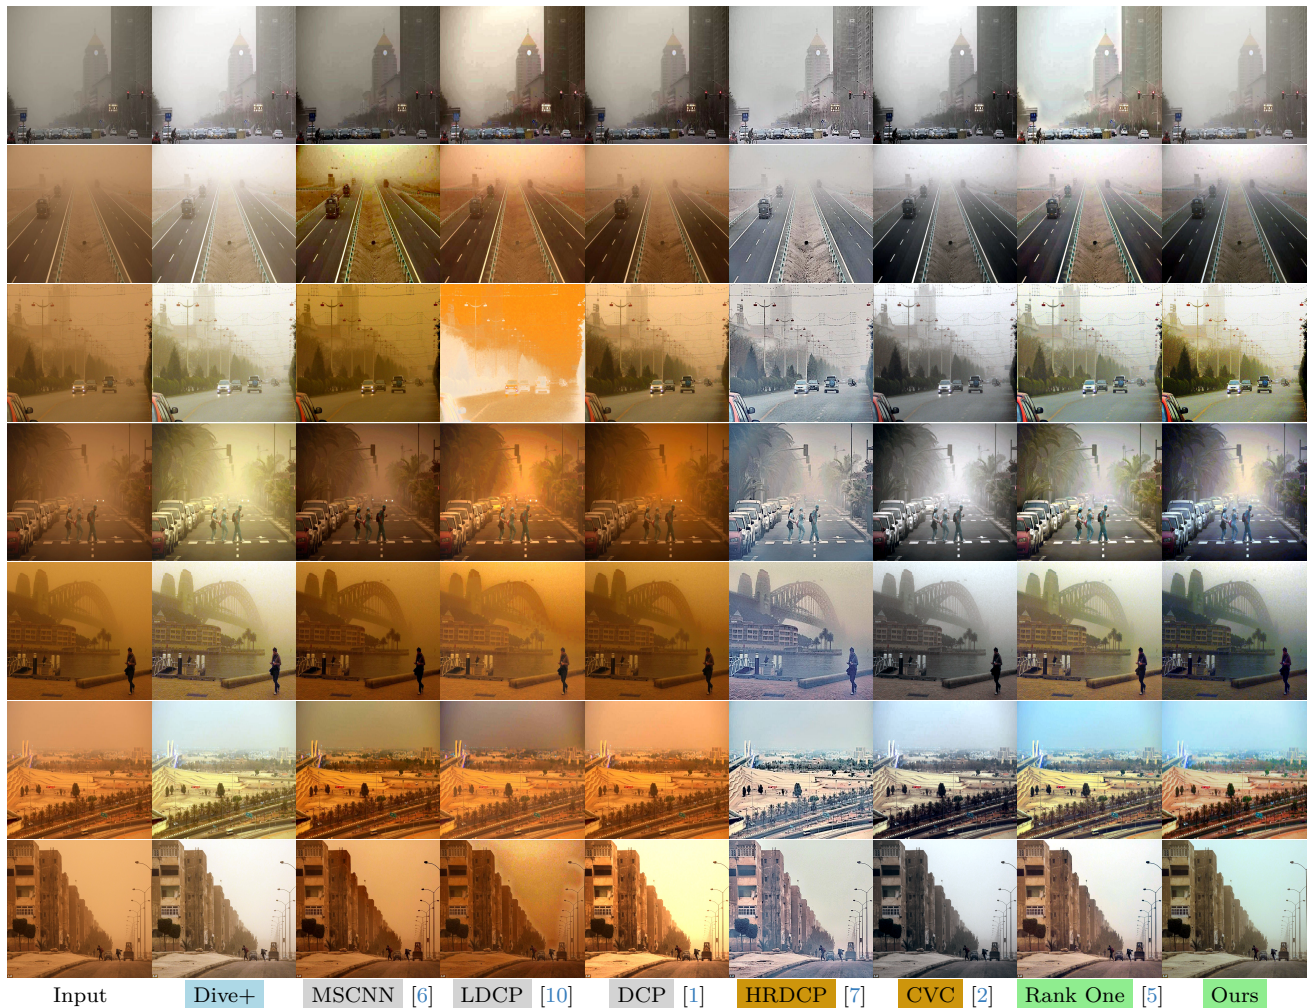

Figure 1. Sandstorm image enhancement results obtained by different methods. (The images are best viewed in the full-screen mode.)

The occurrence of sandstorms significantly reduces visibility, as floating dust and sand scatter and absorb light, creating a negative impact on practical applications. To address this issue, we have developed a novel restoration method and compared it with other common dehazing techniques such as DCP, MSCNN, and LDCP, as well as the underwater image enhancement method Dive+. The results are shown in Fig 1. Traditional dehazing methods often succeed in restoring the main structure of images, but they are not sufficiently effective in dealing with the light scattering and absorption caused by sandstorms. This is likely because these methods are primarily designed based on imaging theories for smoggy weather, and there exist differences in the imaging mechanisms between sandstorms, smoggy weather, and underwater environments. For instance, although the Retinex-based method achieves some success in restoring image quality, it still suffers from color distortion issues, such as generating an unnatural cool tone, causing inconsistent brightness, and losing texture details, thereby reducing image quality. In contrast, the LFP method demonstrates more robust performance in combating sandstorms, effectively restoring the natural colors and structure of images. This is because LFP not only restores the main structure of the images but also effectively mitigates the impact of dust and sandstorms, providing clearer and more natural image results. Therefore, LFP offers a more effective solution for dealing with the reduced visibility caused by sandstorms.

052

053

054

055

056

057

058

059

060

061

062

063

064

065

066 **2.2. Underwater image enhancement**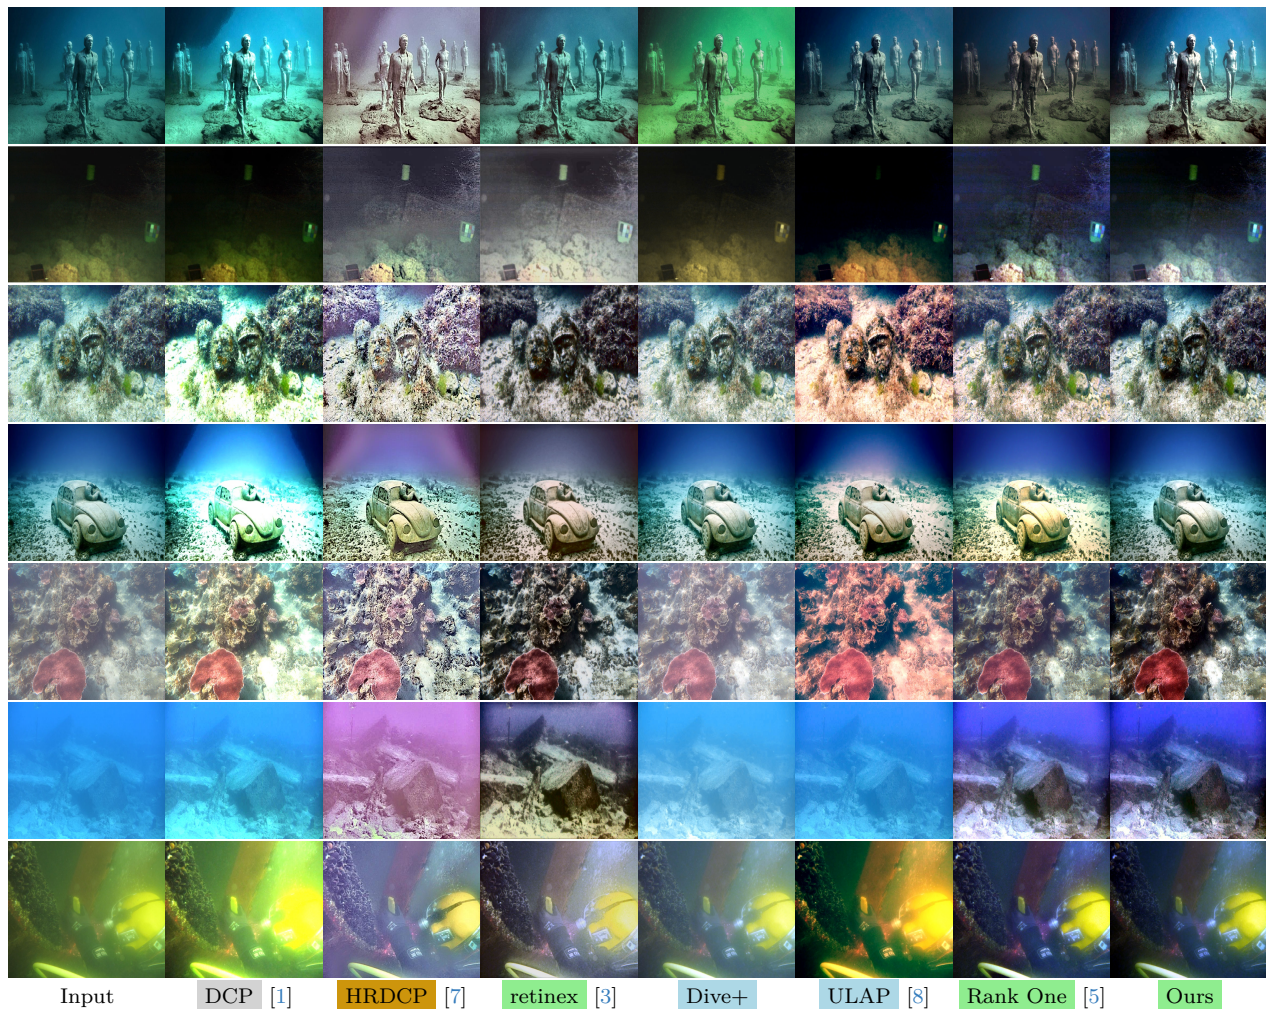

Figure 2. Underwater image enhancement results obtained by different methods. (The images are best viewed in the full-screen mode.)

067 Underwater image enhancement faces a series of unique challenges, including color shifts and low contrast caused  
068 by the scattering and absorption of light by water. To address this, we have developed a novel image optimization  
069 technique aimed at improving the visual effect of underwater images. Our LFP method has been compared with  
070 other dehazing and sandstorm removal methods (such as DCP and HRDCP), other underwater image optimization  
071 methods (like Retinex, ULAP, Rank One), and commercial applications like Dive+. The comparison results are  
072 shown in Fig 2. Although some traditional image optimization techniques can improve image quality to some  
073 extent, they are not sufficiently effective in handling the unique challenges of underwater environments, such as  
074 severe color bias. This is likely because these methods are primarily designed based on terrestrial imaging theories,  
075 overlooking the significant differences between imaging mechanisms in underwater and terrestrial environments.  
076 LFP demonstrates superior robustness in handling the unique challenges of underwater environments, effectively  
077 restoring the natural colors and contrast of images. This is because LFP can effectively deal with the color bias  
078 of underwater environments, providing clearer and more natural image results. Therefore, our proposed method  
079 offers a more effective solution for addressing the visual quality degradation caused by underwater environments.

## 2.3. Haze

080

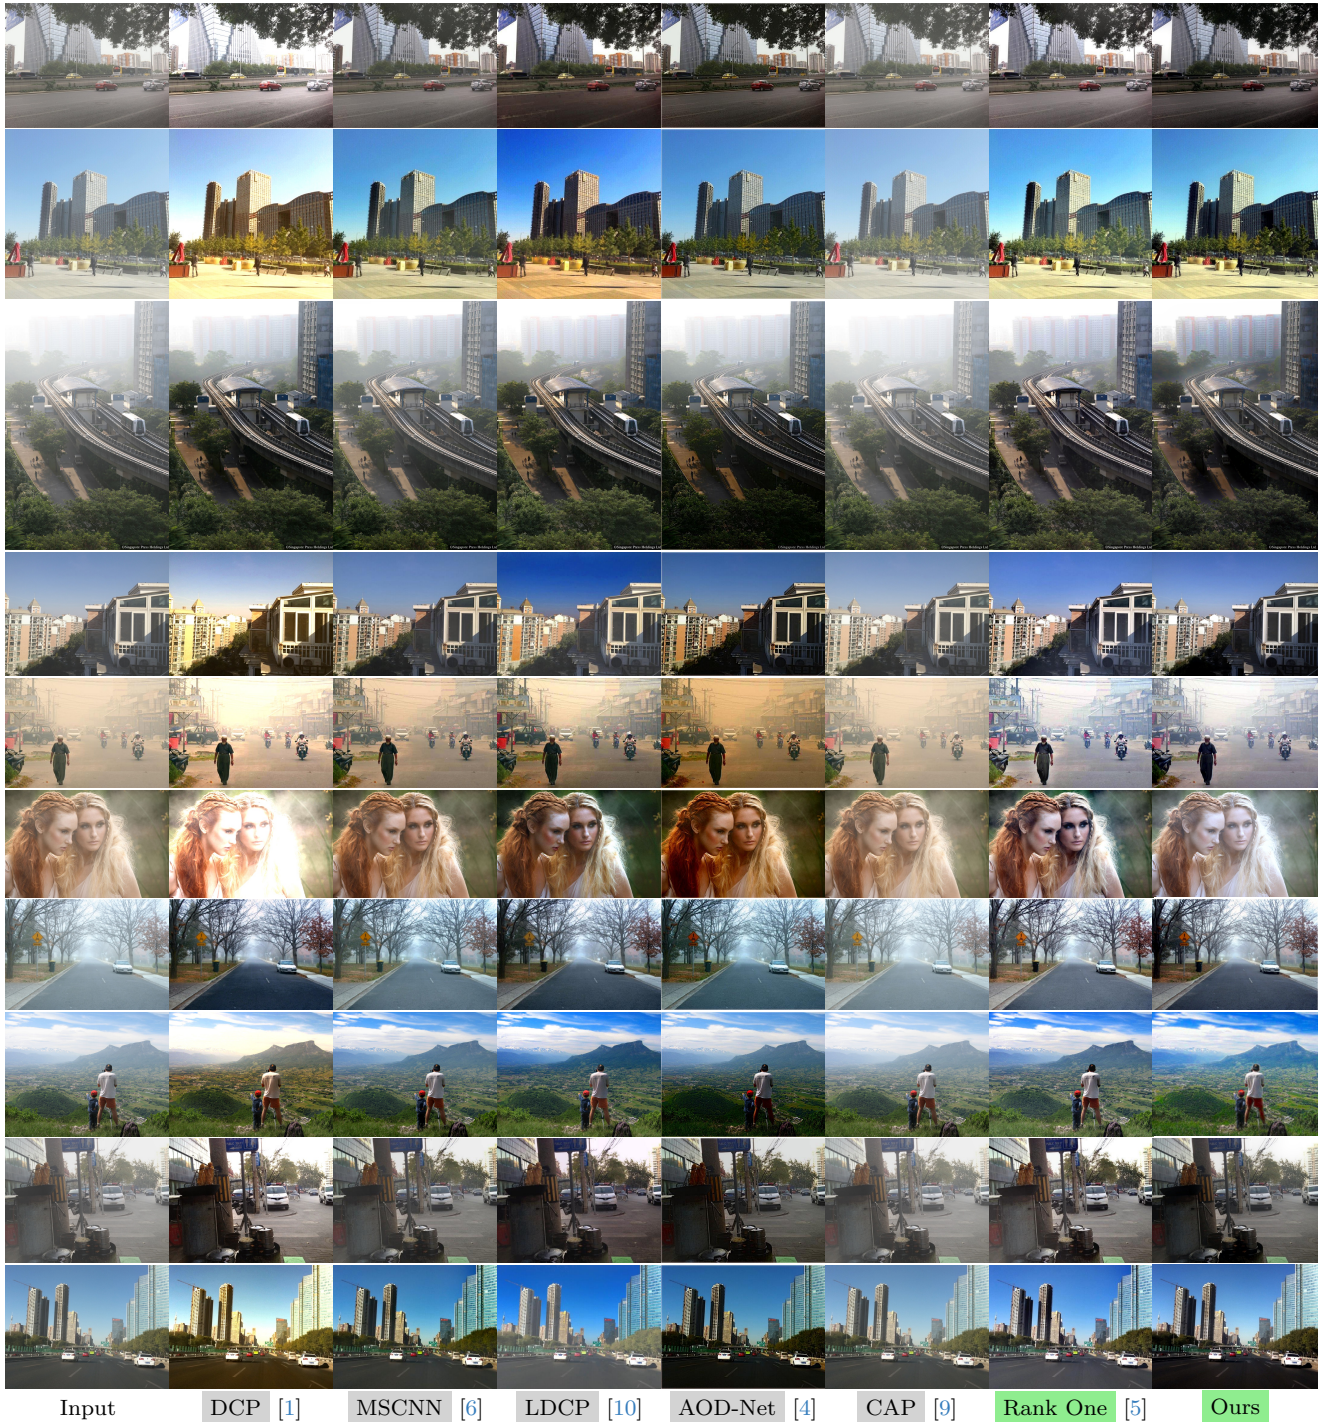

Figure 3. Dehazing results obtained by different methods. (The images are best viewed in the full-screen mode.)

## 081 3. Quantitative Experiments

082 We conducted a simple quantitative analysis. Tab 2 below which summarizes the Peak Signal-to-Noise Ratio (PSNR)  
083 values for different methods under varying adverse weather scenarios. It is evident from the table that LFP outstrips  
084 the competing methods across all tested conditions, showcasing its superior capability in restoring degraded images.

Table 2. PSNRs under different adverse weather scenarios.

|       | DCP   | BCCR  | FVR   | LFP   |
|-------|-------|-------|-------|-------|
| haze  | 19.13 | 14.02 | 11.61 | 21.05 |
| sand  | 7.83  | 6.74  | 6.08  | 15.27 |
| water | 8.65  | 9.49  | 5.63  | 17.41 |

085

### 3.1. OHaze

In practice, hazy images have been captured in presence of real haze, generated by professional haze machines, and O-HAZE contains 45 different outdoor scenes depicting the same visual content recorded in haze-free and hazy conditions, under the same illumination parameters.

NTIRE is a CVPR workshop that aims to provide an overview of the new trends and advances in those areas. Moreover, it offers an opportunity for academic and industrial attendees to interact and explore collaborations. Jointly with workshop NTIRE organised in 2018 the first image dehazing online challenge.

O-HAZE has been employed in the dehazing challenge of the NTIRE 2018 CVPR workshop.

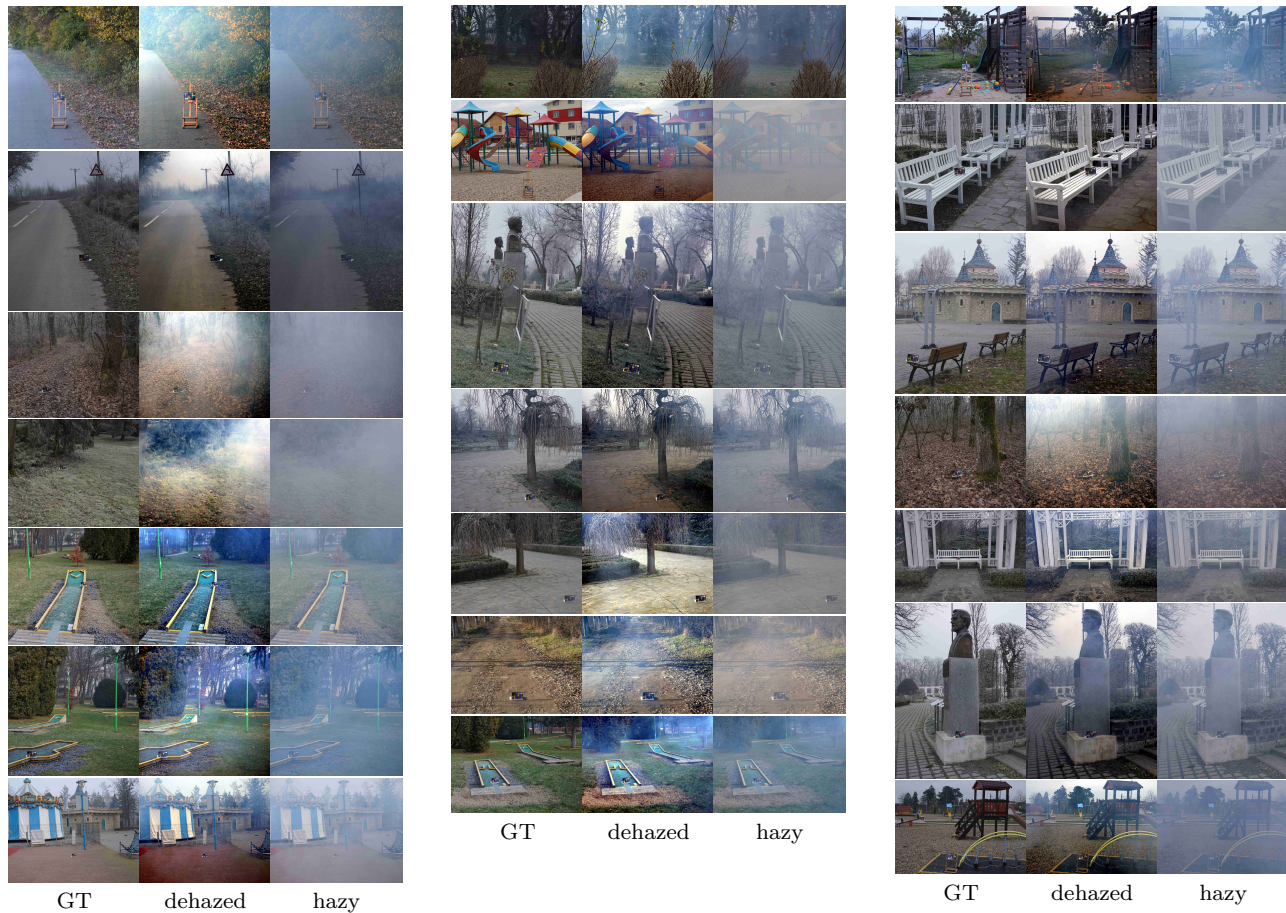

Figure 4. Dehazing results on OHaze dataset. (The images are best viewed in the full-screen mode.)

## 094 4. Comparative Analysis

095 To obtain the luminous flux  $F$  and its variation rate  $\Delta F$ , LFP can calculate both from RGB images and grayscale  
096 images (equal to the V channel in HSV color space). These two computation methods show no significant difference  
097 in visual effects, as is shown in Fig 5.

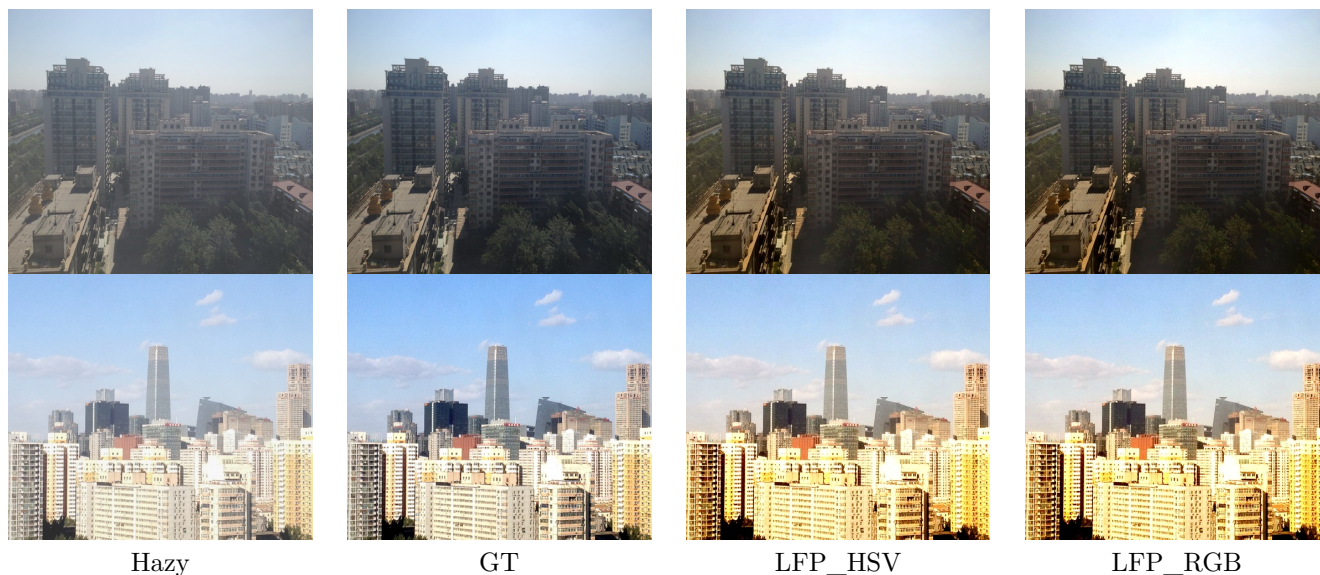

Figure 5. Comparative Analysis of the Dehazing Effect using RGB and Grayscale Images, there is no significant difference between the two methods.

## 098 References

- 099 [1] Kaiming He, Jian Sun, and Xiaoou Tang. Single image haze removal using dark channel prior. *IEEE transactions on*  
100 *pattern analysis and machine intelligence*, 33(12):2341–2353, 2010. 1, 2, 3, 4, 5
- 101 [2] Jong-Ju Jeon, Tae-Hee Park, and Il-Kyu Eom. Sand-dust image enhancement using chromatic variance consistency  
102 and gamma correction-based dehazing. *Sensors*, 22(23):9048, 2022. 2, 3
- 103 [3] Edwin H Land. The retinex theory of color vision. *Scientific american*, 237(6):108–129, 1977. 2, 4
- 104 [4] Boyi Li, Xiulian Peng, Zhangyang Wang, Jizheng Xu, and Dan Feng. Aod-net: All-in-one dehazing network. In  
105 *Proceedings of the IEEE international conference on computer vision*, pages 4770–4778, 2017. 2, 5
- 106 [5] Jun Liu, Wen Liu, Jianing Sun, and Tiejiong Zeng. Rank-one prior: Toward real-time scene recovery. In *Proceedings*  
107 *of the IEEE/CVF Conference on Computer Vision and Pattern Recognition*, pages 14802–14810, 2021. 2, 3, 4, 5
- 108 [6] Wenqi Ren, Si Liu, Hua Zhang, Jinshan Pan, Xiaochun Cao, and Ming-Hsuan Yang. Single image dehazing via multi-  
109 scale convolutional neural networks. In *European conference on computer vision*, pages 154–169. Springer, 2016. 2, 3,  
110 5
- 111 [7] Zhenghao Shi, Yaning Feng, Minghua Zhao, Erhu Zhang, and Lifeng He. Let you see in sand dust weather: A method  
112 based on halo-reduced dark channel prior dehazing for sand-dust image enhancement. *Ieee Access*, 7:116722–116733,  
113 2019. 2, 3, 4
- 114 [8] Wei Song, Yan Wang, Dongmei Huang, and Dian Tjondronegoro. A rapid scene depth estimation model based on un-  
115 derwater light attenuation prior for underwater image restoration. In *Advances in Multimedia Information Processing–*  
116 *PCM 2018: 19th Pacific-Rim Conference on Multimedia*, Hefei, China, September 21–22, 2018, *Proceedings, Part I* 19,  
117 pages 678–688. Springer, 2018. 2, 4
- 118 [9] Qingsong Zhu, Jiaming Mai, and Ling Shao. A fast single image haze removal algorithm using color attenuation prior.  
119 *IEEE transactions on image processing*, 24(11):3522–3533, 2015. 2, 5
- 120 [10] Yingying Zhu, Gaoyang Tang, Xiaoyan Zhang, Jianmin Jiang, and Qi Tian. Haze removal method for natural restoration  
121 of images with sky. *neurocomputing*, 275:499–510, 2018. 2, 3, 5
